# Supplementary material for: Effects of type II collagen hydrolysates on osteoarthritis through the NF-κB, Wnt/β-catenin and MAPK pathways
Source: Royal Society of Chemistry journal article supplement (doi:10.1039/d1fo03414f), 2021-12-16
Supplement: d1fo03414f1.pdf [file d1fo03414f1.pdf]

1

**Table S1. The primer sequences of the target genes**

| Genes            | Sequences                                                            |
|------------------|----------------------------------------------------------------------|
| IL-6             | Forward: AAGCCAGAGCTGTGCAGATGAGTA<br>Reverse: TTCGTCAGCAGGCTGGCATTGT |
| RUNX2            | Forward: TGCTTCATTCGCCTCACAA<br>Reverse: CTTGCTGTCCTCCTGGAGAAA       |
| $\beta$ -catenin | Forward: TGGTGAAAATGCTTGGGTCG<br>Reverse: TCTGAAGGCAGTCTGTGCGTAATAG  |
| NF- $\kappa$ B   | Forward: CTGAGAACTGCTCGTGGTGT<br>Reverse: GTTCCCATCAATACGCGTGC       |
| HIF-2 $\alpha$   | Forward: GGCCAAACATGGAGGATATG<br>Reverse: AGACCACCACGTCATTCTTCTC-    |
| TAK1             | Forward: CCATCCCAATGGCGTATCTTACA<br>Reverse: TCATCCTGGTCCAATTCTGCAA  |
| MMP13            | Forward: AGTCCTTTTGGCCAGAACTCC<br>Reverse: AAGATGAACATGAGGTCTCGGG    |
| GAPDH            | Forward: GAAGGTGAAGGTCCGAGTC<br>Reverse: GAAGATGGTGATGGGATTTC        |

2

3

4

5 **Table S2. Upregulated proteins in the BIIP group compared with the model group.**

| BIIP & Model | Protein ID | Protein Name                                                            |
|--------------|------------|-------------------------------------------------------------------------|
| 1            | A0A0G2JSK9 | Betaine--homocysteine S-methyltransferase 1                             |
| 2            | A0A0G2JZK2 | Uncharacterized protein                                                 |
| 3            | A0A0G2K5U5 | Polymeric immunoglobulin receptor                                       |
| 4            | A0A0G2K5W3 | Ig-like domain-containing protein                                       |
| 5            | A0A0G2K607 | Leukocyte immunoglobulin-like receptor subfamily B member 3A            |
| 6            | B0BN33     | C-type lectin domain-containing protein                                 |
| 7            | B2RZA9     | Ube2l3 protein                                                          |
| 8            | D4AB01     | Histidine triad nucleotide binding protein 2 (Predicted), isoform CRA_a |
| 9            | F1M0Q9     | Peptidase M20 domain-containing 1                                       |
| 10           | F1M3X5     | Maestro heat-like repeat family member 6                                |
| 11           | M0R838     | Ig-like domain-containing protein                                       |
| 12           | M0RCN6     | Similar to immunoglobulin kappa-chain VK-1                              |
| 13           | P07756     | Carbamoyl-phosphate synthase [ammonia], mitochondrial                   |
| 14           | P61983     | 14-3-3 protein gamma                                                    |
| 15           | P63039     | 60 kDa heat shock protein, mit ochondrial                               |
| 16           | Q2HWF0     | Formin-binding protein 1-like                                           |
| 17           | Q4KLF8     | Actin-related protein 2/3 complex subunit 5                             |
| 18           | Q5PQU8     | Tissue factor pathway inhibitor                                         |

---

|    |        |                                                                  |
|----|--------|------------------------------------------------------------------|
| 19 | Q66H11 | GTP-binding protein Ran                                          |
| 20 | Q6P505 | Proteasome subunit alpha type                                    |
| 21 | Q6P743 | Adenosylhomocysteinase                                           |
| 22 | Q8K571 | ADH-like protein                                                 |
| 23 | Q924C3 | Ectonucleotide pyrophosphatase/phosphodiesterase family member 1 |
| 24 | Q924S5 | Lon protease homolog, mitochondrial                              |

---

6

7

8 **Table S3. Downregulated proteins in the BIIP group compared with the model group.**

| BIIP& Model | Protein ID | Protein Name                                             |
|-------------|------------|----------------------------------------------------------|
| 1           | A0A096MJM7 | Neuralized E3 ubiquitin protein ligase 1                 |
| 2           | A0A0G2JVW1 | Insulin-like growth factor-binding protein 5             |
| 3           | A0A0G2K290 | Ig-like domain-containing protein                        |
| 4           | A0A0G2K8E6 | Vesicle-associated membrane protein-associated protein A |
| 5           | A0A0G2K8K3 | Heparin cofactor 2                                       |
| 6           | A0A0G2K905 | Arp2/3 complex 34 kDa subunit                            |
| 7           | A0A0H2UHP7 | Apolipoprotein A-V                                       |
| 8           | A0S0A9     | Brush border membrane zinc transporter ZIP10             |
| 9           | B5DEZ8     | Plexin domain containing 2 (Predicted)                   |
| 10          | D3ZD40     | Papilin, proteoglycan-like sulfated glycoprotein         |
| 11          | D3ZE87     | G_PROTEIN_RECEP_F3_4 domain-containing protein           |
| 12          | D3ZGF1     | CD44 antigen                                             |
| 13          | D3ZIE4     | FYN-binding protein 1                                    |
| 14          | D3ZPI8     | Complement C8 gamma chain                                |
| 15          | F1LM84     | Nidogen-1                                                |
| 16          | F1LMS5     | Thrombospondin-4                                         |
| 17          | F1LS29     | Calcium-activated neutral proteinase 1                   |
| 18          | F1LUM5     | Tubulin alpha chain                                      |
| 19          | G3V615     | C3/C5 convertase                                         |

---

|    |        |                                                    |
|----|--------|----------------------------------------------------|
| 20 | G3V6S0 | Spectrin $\beta$ chain                             |
| 21 | G3V6S3 | Calumenin                                          |
| 22 | G3V7Q6 | Proteasome subunit $\beta$                         |
| 23 | G3V9R2 | Complement factor H                                |
| 24 | M0R585 | Ig-like domain-containing protein                  |
| 25 | M0R8B5 | Ig-like domain-containing protein                  |
| 26 | M0R979 | Thrombospondin 1                                   |
| 27 | M0RBL2 | Ig-like domain-containing protein                  |
| 28 | M0RCM6 | Ig-like domain-containing protein                  |
| 29 | M0RD20 | Calcium-activated neutral proteinase small subunit |
| 30 | M0RDF0 | Ig-like domain-containing protein                  |
| 31 | M0RDL2 | Ig-like domain-containing protein                  |
| 32 | O70513 | Galectin-3-binding protein                         |
| 33 | O88656 | Actin-related protein 2/3 complex subunit 1B       |
| 34 | P00762 | Anionic trypsin-1                                  |
| 35 | P01681 | Ig kappa chain V region S211                       |
| 36 | P01805 | Ig heavy chain V region IR2                        |
| 37 | P01883 | Ig delta chain C region                            |
| 38 | P02767 | Transthyretin                                      |
| 39 | P16296 | Coagulation factor IX                              |
| 40 | P25113 | Phosphoglycerate mutase 1                          |

---

---

|    |        |                                                            |
|----|--------|------------------------------------------------------------|
| 41 | P28064 | Proteasome subunit $\beta$ type-8                          |
| 42 | P50123 | Glutamyl aminopeptidase                                    |
| 43 | P69897 | Tubulin $\beta$ -5 chain                                   |
| 44 | Q3KR94 | Vitronectin                                                |
| 45 | Q4KM35 | Proteasome subunit $\beta$ type-10                         |
| 46 | Q4KM73 | UMP-CMP kinase                                             |
| 47 | Q5EBC0 | Inter alpha-trypsin inhibitor, heavy chain 4               |
| 48 | Q5M7T5 | Antithrombin-III                                           |
| 49 | Q5M7V3 | LOC367586 protein                                          |
| 50 | Q5RJR2 | Twinfilin-1                                                |
| 51 | Q62862 | Dual specificity mitogen-activated protein kinase kinase 5 |
| 52 | Q62975 | Protein Z-dependent protease inhibitor                     |
| 53 | Q68FT8 | RCG33981, isoform CRA_a                                    |
| 54 | Q6IFV1 | Keratin, type I cytoskeletal 14                            |
| 55 | Q6P3V8 | RNA helicase                                               |
| 56 | Q6PAH0 | Apolipoprotein E                                           |
| 57 | Q9JLJ3 | 4-trimethylaminobutyraldehyde dehydrogenase                |
| 58 | Q6IRK9 | Carboxypeptidase Q                                         |

---

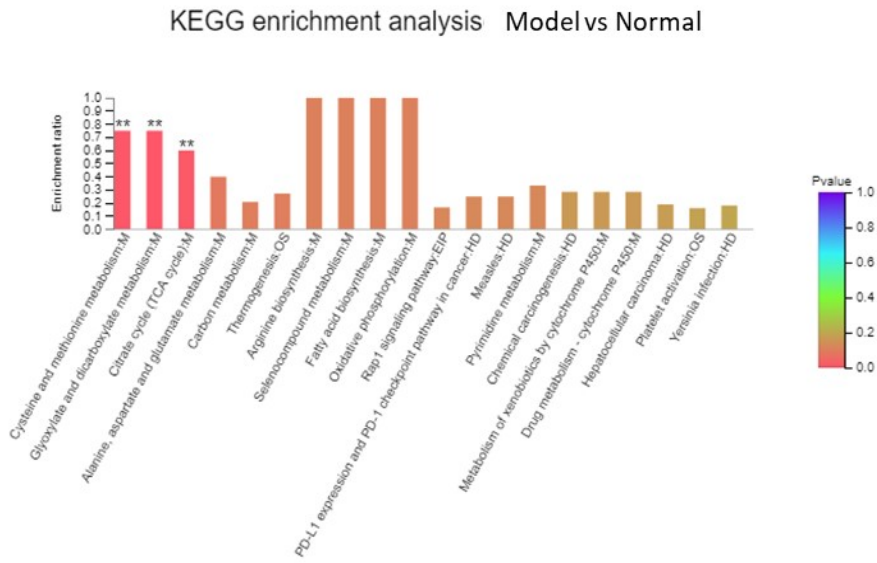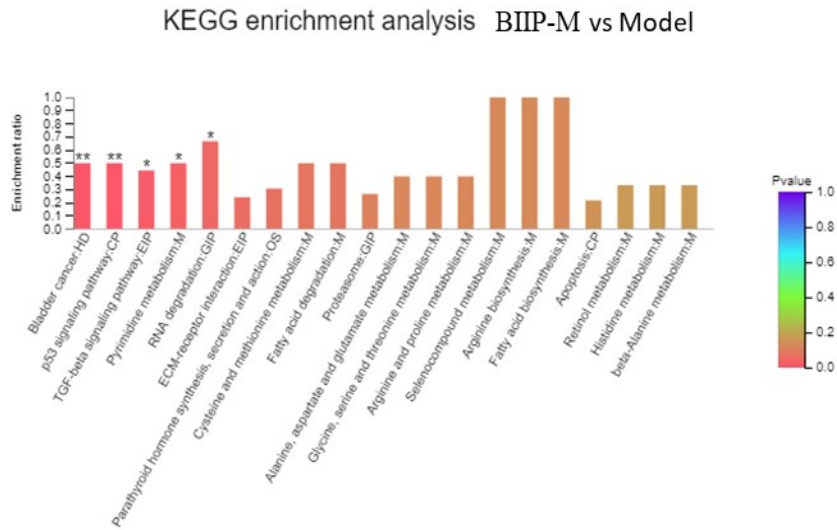

12

13 **Figure S1. KEGG functional enrichment analysis. \*\* represents  $P < 0.01$ , and \* represents**

14

**$P < 0.05$ .**

15
